# 1 **Boosting transformation in wheat by BBM-WUS**

2 **Ziru Zhou<sup>1</sup>, Yawen Yang<sup>2</sup>, Guo Ai<sup>1</sup>, Miaomiao Zhao<sup>1</sup>, Baozhu Han<sup>2</sup>, Chunjie**  
3 **Zhao<sup>1</sup>, Yiqian Chen<sup>1</sup>, Yuwei Zhang<sup>1</sup>, Hong Pan<sup>2</sup>, Caixia Lan<sup>1</sup>, Qiang Li<sup>1</sup>, Jieting**  
4 **Xu<sup>2,\*</sup>, Wenhao Yan<sup>1,\*</sup>**

5 <sup>1</sup>National Key Laboratory of Crop Genetic Improvement, Hubei Hongshan Laboratory,  
6 Huazhong Agricultural University, Wuhan, China

7 <sup>2</sup>WIMI Biotechnology Co., Ltd, Changzhou, China

8 **\*Correspondence:** Jieting Xu (xjt@wimibio.com), Wenhao Yan  
9 (yanwenhao@mail.hzau.edu.cn)

10 **Keywords:** Agrobacterium-mediated transformation, BBM-WUS, GRF-GIF, wheat.

11 **Abstract**

12 Agrobacterium-mediated transformation is a cost-effective and convenient way to  
13 introduce foreign genetic elements to plants. However, only limited protocols  
14 successfully generates transgenic plants with fielder, a spring wheat variety. Wheat  
15 transformation method with higher efficiency and without genotype restriction is  
16 heavily demanded. Here, a heat-shock protocol, independent of Japan Tobacco had  
17 been established. Transgenic plants can be obtained from immature embryo within  
18 only 60 days by this protocol. Morphogenic regulators Baby boom and Wuschel  
19 (BBM-WUS) was proved to promote transformation efficiency for five to six times in  
20 wheat when co-infiltrated with agrobacterium containing target construct. Notably,  
21 half of the transformants are BBM-WUS free and moreover, the BBM-WUS  
22 containing plants could be picked by florescent marker that was co-expressed with  
23 BBM-WUS. In conclusion, we managed to establish a new wheat transformation  
24 protocol with shorter duration than published protocol.

25

26 Results

27 Transgenic technology greatly promotes function genomic study and precision  
28 breeding in crops. Compared with biolistic bombardment, agrobacterium-mediated  
29 transformation is a low-cost and more favorable method in terms of clearer and easier  
30 genetic lineage of the transgenic lines with very few integrated T-DNA copies. Till  
31 now, agrobacterium-mediated transformation methods have been established in all  
32 three major crops, including rice, maize and wheat. Rice transformation system uses  
33 callus induced from mature seeds but only immature embryo could be used to perform  
34 transformation in maize and wheat (Hiei and Komari, 2008; Huw and Peter, 2009;  
35 Sidorov and Duncan, 2009). A morphological gene pair, Baby boom and Wuschel  
36 (BBM-WUS) has been used to boost transformation in maize. BBM-WUS induces  
37 somatic embryo to facilitate transformation shortly after infiltration (Lowe et al.,  
38 2016). In wheat, Japan Tobacco Company developed a protocol to perform  
39 agrobacterium-mediated transformation (Ishida et al., 2015). Based on this method,  
40 Debernardi and colleagues discovered the morphological gene,  
41 GROWTH-REGULATING FACTOR 4 and its cofactor GRF-INTERACTING  
42 FACTOR 1 (GRF-GIF) chimera as a booster for wheat transformation, which was  
43 later been verified in a transient expression assay (Debernardi et al., 2020; Qiu et al.,  
44 2021). However, the method developed by Japan Tobacco has been patented and is  
45 not fully open, so only a few organizations that paid the fee could use the method with  
46 restrictions. Development of new protocols for efficient agro-transformation in wheat  
47 is highly demanded. Except for GRF-GIF, whether BBM-WUS would promote wheat  
48 transformation remains unknown.

49 In order to establish the agrobacterium-mediated transformation method in wheat, we  
50 first tried the methods published by JP and another study from England (Hayta et al.,

51 2019). Unfortunately, we hardly obtain any transformants from either method,  
52 possibly due to the failure of infection, which was indicate by nonexistent GFP signal  
53 and super unhealthy immature embryo after selection. We then tested different  
54 combinations among parameters of medium-components, embryo size and infiltration  
55 method to figure out an optical combination. We found that a heat-shock protocol  
56 worked efficiently. In this protocol, we incubated bacterium with immature embryo at  
57 42 degree for 2 minutes. The best immature embryo size for transformation is  
58 1.5-2.0mm and our self-developed co-culture medium worked best. Strong GFP signal  
59 could be observed after co-inoculation. The infected embryo was transferred to resting  
60 medium after co-cultivation. One week later, the embryo was submitted to selection  
61 medium. Notably, we combined selection and regeneration as one single step which  
62 largely shortens the whole process to around 40 days before we could proceed rooting.  
63 Following the method we described above, we successfully obtain transgenic plants  
64 from immature embryo within 60 days with an average value of 3.72% (34/902)  
65 (Figure 1a).

66 Inspired by the fact that morphological genes could enhance transformation, we fist  
67 tested whether BBM-WUS could accelerate transformation in wheat. BBM-WUS  
68 induces neighboring cells to form somatic embryo to be easily infected by  
69 agrobacterium thus eliminate the T-DNA of morphological genes. Strikingly,  
70 BBM-WUS elevated the positive rate from 1.14% to 9.74% and 3.03% to 20.38%  
71 when co-infiltrated with constructs which possess strong eGFP and moderate mGFP  
72 signal, respectively. For the empty vector, the positive rate was increased from 6.03%  
73 to 29.62% (Figure 1b). The expression level of GFP reporter affects transformation  
74 efficiency here. In general, BBM-WUS helps to enhance transformation efficiency for  
75 five to six times than the one without morphological gene. As expected, of all

76 transformants, around half of the positive transgenic plants contain only GFP but not  
77 BBM-WUS thus to eliminate the growth defects caused by BBM-WUS (Figure 1c,d).  
78 Moreover, the aleurone specially expressed red florescence marker was placed  
79 together with BBM-WUS within one T-DNA to facilitate removing seeds expressing  
80 BBM-WUS(Xu et al., 2021)(Figure 1e). Although the red color is not easy to be  
81 recognized by naked eyes, the seeds containing the red florescent marker can be  
82 clearly distinguished from the ones without the marker under fluorescent light (Figure  
83 1f).

84 One big challenge of bacterium-mediated transformation is that the efficiency is  
85 tightly linked with genotype. Currently, only a few accessions including fielder,  
86 bobwhite and Kenong199 are reported to be easily transformed. Manipulating elite  
87 wheat is more desirable for wheat improvement. Yangmai23 and Yangmai158, two  
88 elite varieties that are widely grown along Yangzi River were used to test whether our  
89 BW method could expand the genotypes. We successfully got positive transformants  
90 from both accessions (Figure 1h). This result convinced us that the newly developed  
91 agrobacterium-mediated wheat transformation method plus morphological genes is an  
92 efficient solution to break the genotype restriction in wheat.

93 In conclusion, we managed to establish an efficient wheat transformation protocol  
94 independent of Japan Tobacco protocol. In this protocol, morphological genes  
95 BBM-WUS were found to boost agrobacterium-mediated transformation in wheat for  
96 the first time. Future effect should be investigated to identify novel boosters, such as  
97 downstream causal targets of BBM-WUS.

#### 98 **Author Contributions**

99 Z.Z., Y.Y., C.Z. and B.H. tested the conditions and established the protocol. Z.Z., Y.C.,

100 and H.P. conducted the genotyping and collected the data. M.Z., Y.Z., C.L., and Q.L.  
101 provided the immature embryos. J.X. generated the constructs with help from Z.Z and  
102 G.A. W.Y. analyzed the data and wrote the manuscript with input from J.X. J.X and  
103 W.Y. conceived of the study. All authors read and approved the final manuscript.

#### 104 **Conflict of Interest**

105 Y.Y., B.H., H.P., and X.J. are employees of WIMI Biotechnology Company.

#### 106 **Acknowledgements**

107 This work was supported by the National Key Research and Development Program of  
108 China (2020YFE0202300) and the Fundamental Research Funds for the Central  
109 Universities (2662020ZKPY002).

#### 110 **References**

- 111 1. Debernardi J M, Tricoli D M, Ercoli M F et al. A GRF-GIF chimeric protein  
112 improves the regeneration efficiency of transgenic plants. *Nature*  
113 *Biotechnology*, 2020, 38:1274-1279
- 114 2. Gordon-Kamm B, Sardesai N, Arling M et al. Using Morphogenic Genes to  
115 Improve Recovery and Regeneration of Transgenic Plants. *Plants*, 2019,  
116 8,1-15
- 117 3. Hayta S, Smedley M A, Demir S U et al. An efficient and reproducible  
118 Agrobacterium-mediated transformation method for hexaploid wheat  
119 (*Triticum aestivum* L.). *Plant Methods*, 2019, 15:121
- 120 4. Hiei Y and Komari T. Agrobacterium-mediated transformation of rice using

- 121 immature embryos or calli induced from mature seed. *Nat Protocol*, 2008,  
122 3:824-834
- 123 5. Huw D and Peter R. Transgenic Wheat, Barley and Oats. *Methods In*  
124 *Molecular Biology*, 2009, 3-20
- 125 6. Ishida Y, Tsunashima M, Hiei Y et al. Wheat (*Triticum aestivum* L.)  
126 transformation using immature embryos. *Methods In Molecular Biology*, 2015,  
127 1223:189-198
- 128 7. Lowe K, Wu E, Wang N et al. Morphogenic Regulators Baby boom and  
129 Wuschel Improve Monocot Transformation. *The Plant Cell*, 2016,  
130 28:1998-2015
- 131 8. Qiu F, Xing S, Xue C et al. Transient expression of a TaGRF4-TaGIF1  
132 complex stimulates wheat regeneration and improves genome editing. *Sci*  
133 *China Life Science*, 2021, doi: 10.1007/s11427-021-1949-9
- 134 9. Xu J, Yin Y, Jian L et al. Seeing is believing: a visualization toolbox to  
135 enhance selection efficiency in maize genome editing. *Plant Biotechnology*  
136 *Journal*, 2021, 19:872-874

137

### 138 **Figure Legend**

139 Figure 1. Efficient agrobacterium-mediated transformation methods in wheat boosted  
140 by BBM-WUS and GRF-GIF. (a). Complete duration from immature embryo to  
141 transgenic plants. (b-d) BBM-WUS significantly increased transformation efficiency  
142 and half are BBM-WUS free transgenic plants. p203156 is an empty vector; p203157

143 contains mGFP and p203158 contains enhanced GFP (eGFP). The red arrow in the  
144 DNA gel picture indicates BBM-WUS free transformants and the table shows the  
145 presence of BBM-WUS and targeted DNA. (e) Schematic diagram of BBM-WUS  
146 construct containing red florescent marker. (f) Visualization of red florescent signal.  
147 (g) Performance of infected embryo with or without booster at regeneration stage. (h)  
148 Transformation efficiency in Yangmai23 (Y23) and Yangmai158 (Y158) by using  
149 BBM-WUS.

**Figure 1.**

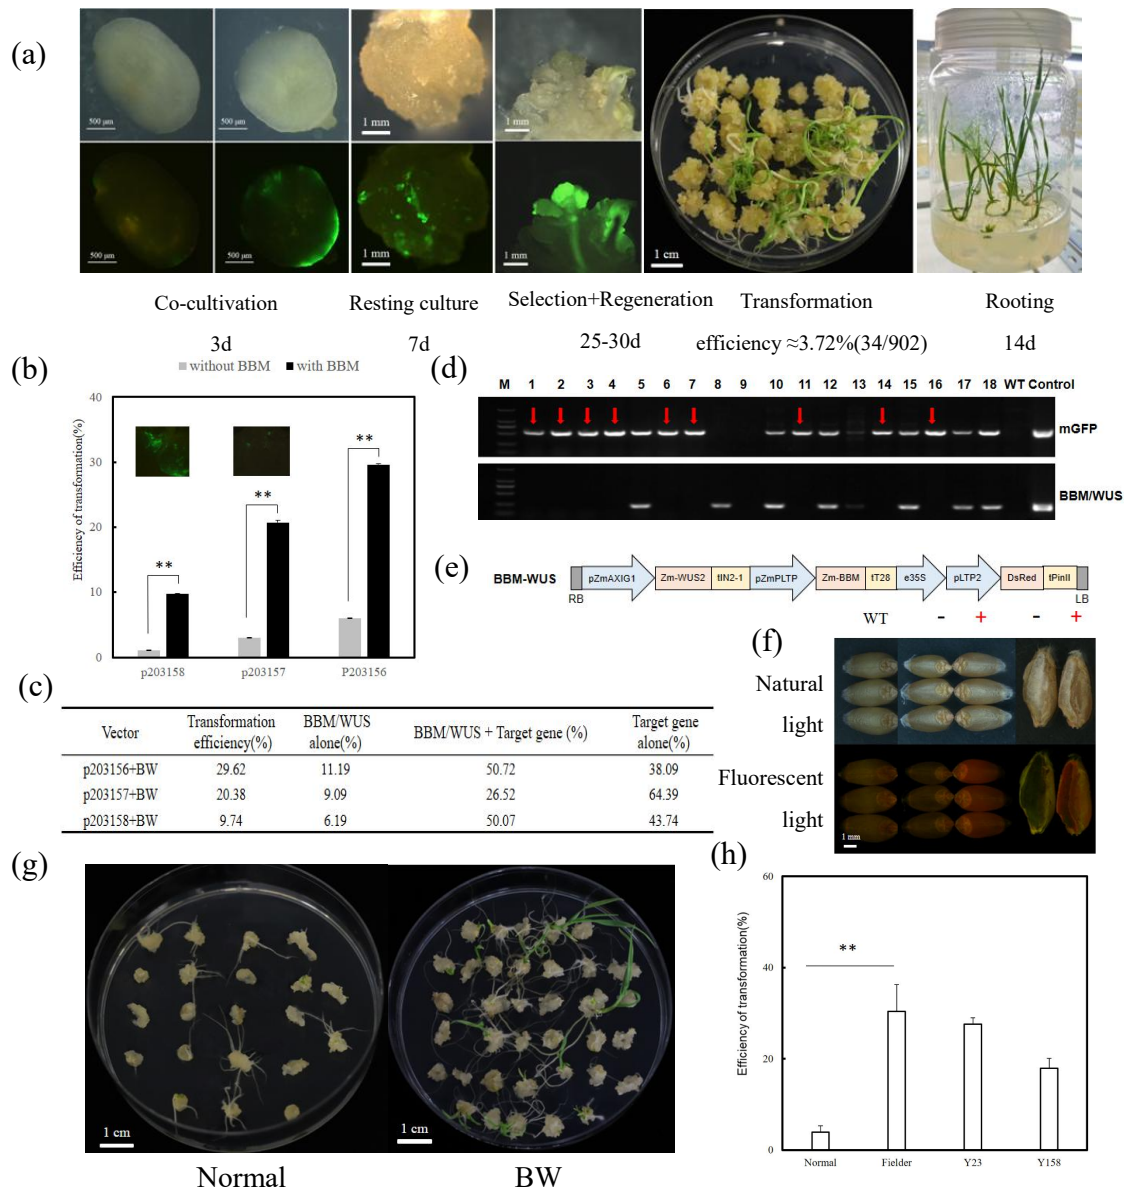

Source: https://www.biorxiv.org/content/10.1101/2022.03.13.483388v1.full.pdf
